# Supplementary material
Source: HighWire-hosted journal article supplement (https://www.annfammed.org/highwire/filestream/25456/field_highwire_adjunct_files/0/AhernSupp.pdf)
Supplement: AhernSupp.pdf [file AhernSupp.pdf]

Supplemental materials for

Ahern J, Pleman B, O'Connor N, Silk H. Uptake of a multilingual intervention to promote toothbrushing in a safety-net health care system. *Ann Fam Med*. 2024;22:173.

---

## References

1. Clark MB, Keels MA, Slayton RL; Section on Oral Health. Fluoride use in caries prevention in the primary care setting. *Pediatrics*. 2020;146(6):e2020034637. 10.1542/peds.2020-034637
  2. Wright JT, Hanson N, Ristic H, et al. Fluoride toothpaste efficacy and safety in children younger than 6 years: a systematic review. *J Am Dent Assoc*. 2014;145(2):182-189. 10.14219/jada.2013.37
  3. Martin M, Pugach O, Avenetti D, et al. Oral health behaviors in very young children in low-income urban areas in Chicago, Illinois, 2018-2019. *Prev Chronic Dis*. 2020;17:E152. 10.5888/pcd17.200213
- 

## Pediatric Toothbrushing Kit

*Please find enclosed Crest® Kid's Cavity Protection Sparkle Fun Toothpaste and a GUM® Crayola™ Pip-Squeaks™ Toothbrush.*

Toothbrushing instructions to help you look after your child's teeth 😊

- Parents/caregivers should begin brushing their child's teeth as soon as they begin to come into the mouth (usually at 6 months of age).
- Teeth should be brushed twice per day (morning and night).
- Parents/caregivers should supervise children younger than 8 years of age to ensure that all teeth are brushed, and that the proper amount of toothpaste is used.

\*If your child is younger than 3 years of age, you should use a fluoride-containing toothpaste in an amount no greater than **the size of a grain of rice**.

\*If your child is 3 years of age or older, you should use a fluoride-containing toothpaste in an amount no greater than **the size of a pea**.

### Kit de escovação de dentes pediátrica

Encontre anexo o creme dental Crest® Kid's Cavity Protection Sparkle Fun e uma escova de dentes GUM® Crayola™ Pip-Squeaks™.

Instruções de escovação para ajudá-lo a cuidar dos dentes do seu filho ☺

- Os pais/cuidadores devem começar a escovar os dentes dos filhos assim que eles comecem a aparecer na boca (geralmente aos 6 meses de idade).
- Os dentes devem ser escovados duas vezes por dia (de manhã e à noite).
- Os pais/cuidadores devem supervisionar as crianças com menos de 8 anos de idade para garantir que todos os dentes sejam escovados e que seja utilizada a quantidade adequada de creme dental.

\*Se o seu filho tiver menos de 3 anos, você deve usar um creme dental com flúor em uma quantidade não superior ao **tamanho de um grão de arroz**.

\*Se o seu filho tiver 3 anos ou mais, você deve usar um creme dental com flúor em uma quantidade não superior ao **tamanho de uma ervilha**.

### Kit de cepillado dental pediátrico

En este kit encontrará una pasta dental de protección contra caries Sparkle Fun de Crest® y un cepillo de dientes GUM® Crayola™ Pip-Squeaks™.

Instrucciones de cepillado de dientes para ayudar a su hijo a cuidar de sus dientes ☺

- Los padres/cuidadores deben comenzar a cepillar los dientes de su hijo tan pronto como empiecen a salir, generalmente a los 6 meses de edad.
- Los dientes deben cepillarse dos veces al día (mañana y noche).
- Los padres/cuidadores deben supervisar a los niños menores de 8 años para verificar que se hayan cepillado todos los dientes y que se use la cantidad adecuada de pasta dental.

\*Si su hijo es menor de 3 años de edad, debe usar el equivalente de **un grano de arroz** de pasta dental con flúor.

\*Si su hijo tiene 3 años de edad o más, debe usar el equivalente de **un guisante** de pasta dental con flúor.

## Materyèl Pedyatrik pou Bwose Dan

*Tanpri jwenn yon dantifris Crest® pou Timoun yo kap Pwoteje yo kont Kari ak yon Bwòs Dan GUM® Crayola™ Pip-Squeaks™.*

Enstriksyon pou bwose dan pou ede w pran swen dan pitit ou a ☺

- Paran/moun ki bay swen yo ta dwe kòmanse bwose dan pitit yo le pli vit yo kòmanse antre nan bouch la (anjeneral nan laj 6 mwa).
- Yo ta dwe bwose dan de fwa pa jou (maten ak swa).
- Paran/moun k ap bay swen yo ta dwe veye timoun ki poko gen 8 an pou asire tout dan yo bwose, epi yo itilize yon bon kantite dantifris.

\*Si pitit ou a gen mwens pase 3 an, ou ta dwe itilize yon dantifris ki gen fliyò nan yon kantite ki pa depase **gwochè yon grenn diri**.

\*Si pitit ou a gen 3 an oswa plis, ou ta dwe itilize yon dantifris ki gen fliyò nan yon kantite ki pa depase **gwochè yon grenn pwa**.

## बाल चिकित्सा टूथब्रस किट

*कृपया संलग्न Crest® Kid को दाँत किराले खान नदिने स्मार्कल फन दन्तमन्जन र GUM® Crayola™ Pip-Squeaks™ टूथब्रस फेला पार्नुहोस् ।*

तपाईंको बच्चाको दाँत हेरचाह गर्न मद्दतका लागि दाँत माझे सम्बन्धी निर्देशनहरू ☺

- आमाबाबु/स्याहारकर्ताहरूले आफ्नो बच्चाको दाँत आउन थालेपछि (सामान्यतया 6 महिनाको उमेरमा) माझिदिन सुरु गर्नुपर्दछ ।
- दिनमा दुई पटक (बिहान र राति) दाँत माझ्नुपर्दछ ।
- आमाबाबु/स्याहारकर्ताहरूले 8 वर्षभन्दा कम उमेरका बच्चाहरूलाई सबै दाँत माझिएको र दन्तमन्जनको उचित मात्रा प्रयोग गरिएको कुरा सुनिश्चित गर्नका लागि निरीक्षण गर्नुपर्दछ ।

\*यदि तपाईंको बच्चा 3 वर्षभन्दा कम उमेरका छन् भने, तपाईंले **चामलको दाना जति** मात्रामा फ्लोराइडयुक्त दन्तमन्जन प्रयोग गर्नुपर्दछ ।

\*यदि तपाईंको बच्चा 3 वर्ष वा सोभन्दा बढी उमेरका छन् भने, तपाईंले **केराउको गेडा जति** मात्रामा फ्लोराइडयुक्त दन्तमन्जन प्रयोग गर्नुपर्दछ ।

## مجموعة فرش أسنان الأطفال

تشتمل على معجون أسنان Crest® Kid's Protection Sparkle Fun، وفرشاة أسنان Pip-Squeaks™ Crayola GUM™.

### تعليمات تنظيف الأسنان لتساعدك على العناية بأسنان طفلك ☺

- يجب أن يبدأ الآباء/مقدمو الرعاية بغسل أسنان أطفالهم بالفرشاة بمجرد أن تظهر الأسنان (عادة في عمر 6 أشهر).
- يجب تنظيف الأسنان بالفرشاة مرتين يومياً (صباحاً ومساءً).
- يجب على الآباء/مقدمي الرعاية الإشراف على الأطفال الذين تقل أعمارهم عن 8 سنوات للتأكد من تنظيف جميع الأسنان بالفرشاة واستخدام الكمية المناسبة من معجون الأسنان.
- \*إذا كان عمر طفلك أقل من 3 سنوات، يجب استخدام معجون أسنان يحتوي على الفلورايد بكمية لا تزيد عن حجم حبة الأرز.
- \*إذا كان عمر طفلك 3 سنوات أو أكثر، يجب استخدام معجون أسنان يحتوي على الفلورايد بكمية لا تزيد عن حجم حبة البازلاء.
